# Supplementary material
Source: HighWire-hosted journal article supplement (https://www.cancerbiomed.org/content/j.issn.2095-3941.2021.0368)
Supplement: media-1 [file media-1.pdf]

# Supplementary material

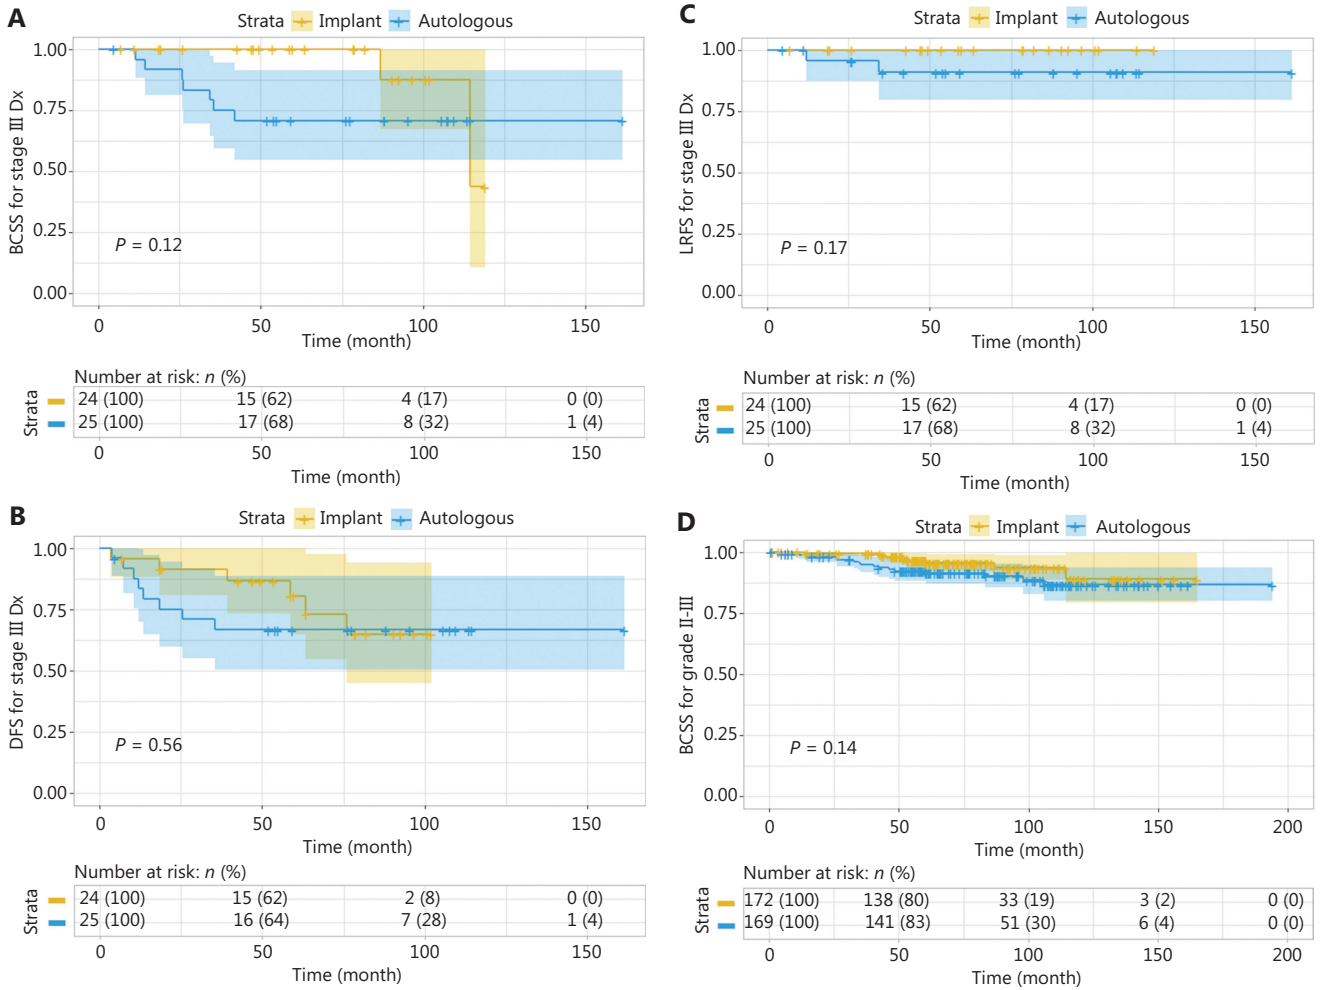

Figure S1 Continued

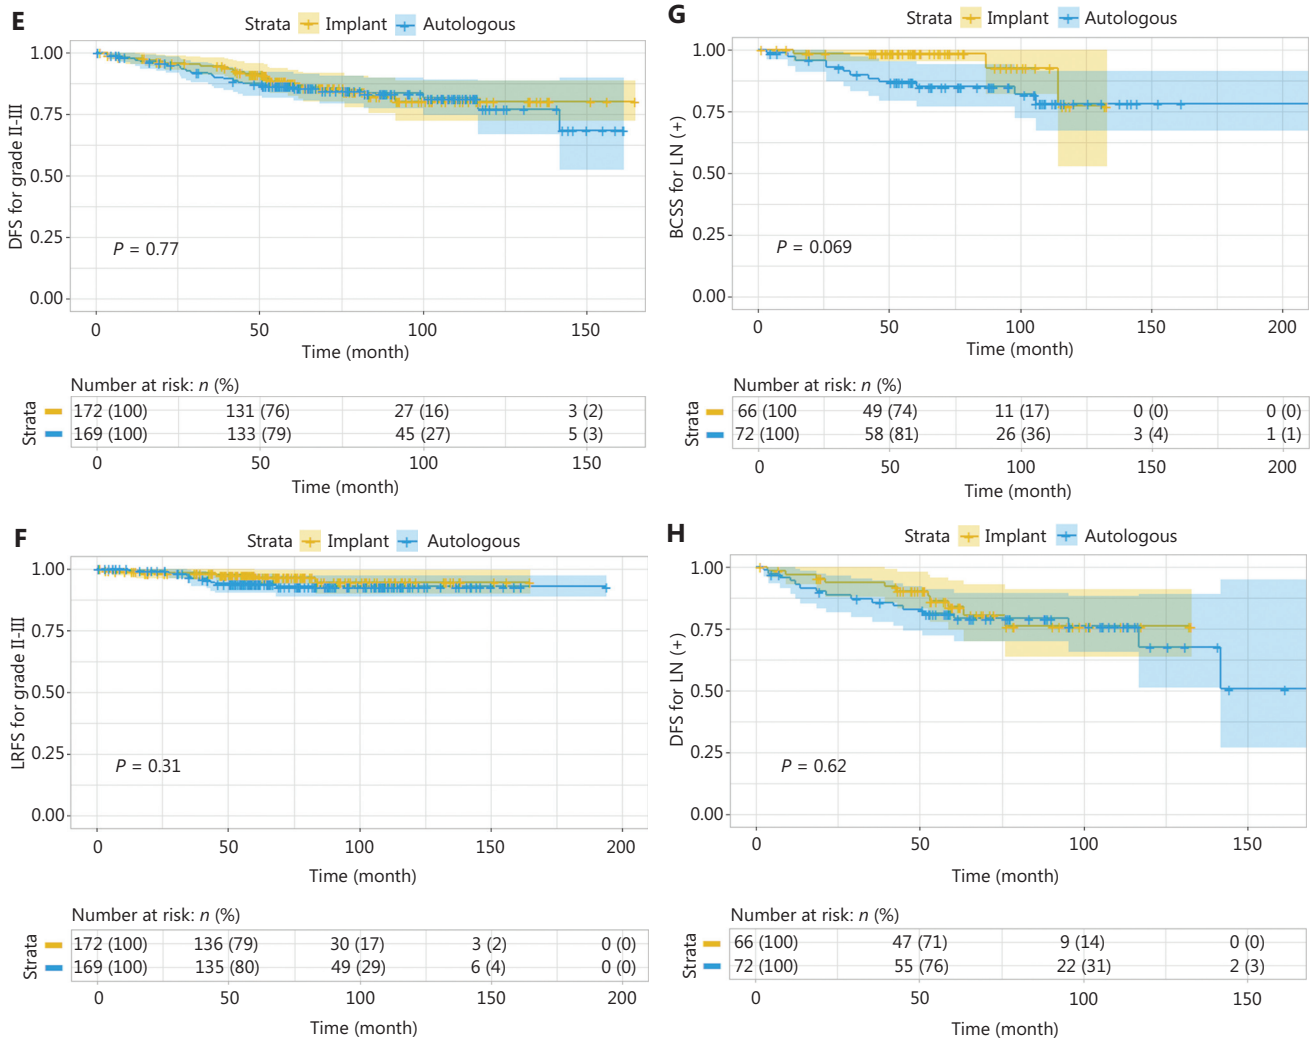

Figure S1 Continued

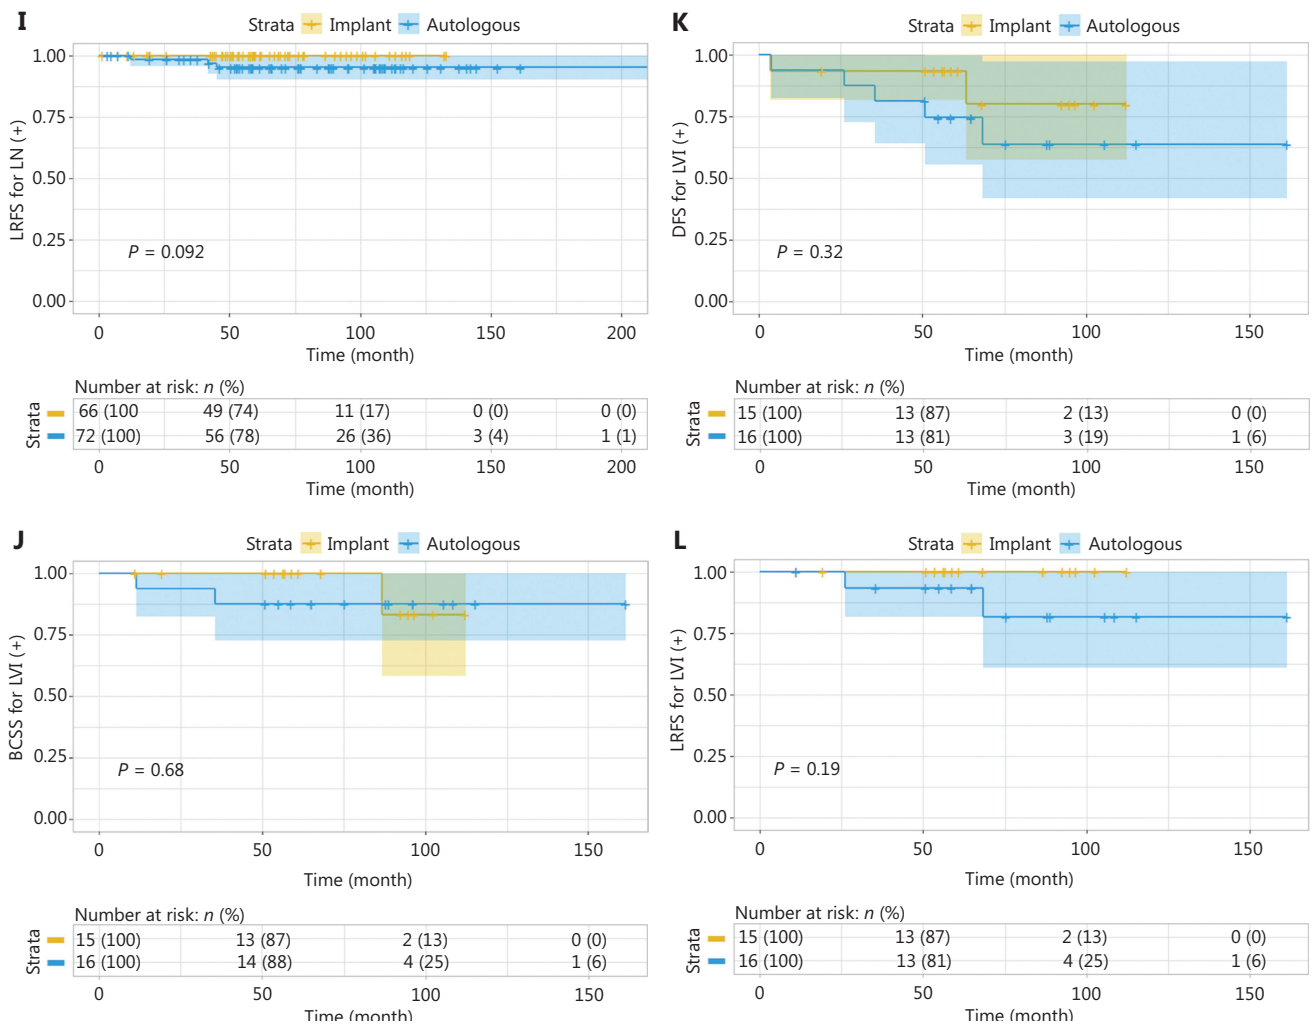

**Figure S1** Breast cancer-specific survival (BCSS), disease-free survival (DFS), and locoregional recurrence-free survival (LRFS) after stratification in patients with (A–C) advanced stage, (D–F) high histological grade, (G–I) positive lymph node, and (J–L) positive lymph-venous invasion in the propensity score matched cohort.
